# Supplementary material for: Enhanced upconversion luminescence in LuPO4:Ln3+ phosphors via optically inert ions doping
Source: Royal Society of Chemistry journal article supplement (doi:10.1039/c8nj02966k), 2018-01-01
Supplement: c8nj02966k1.pdf [file c8nj02966k1.pdf]

## **Enhanced upconversion luminescence in $\text{LuPO}_4:\text{Ln}^{3+}$ phosphors via optical-inert ions doping**

Zongxue Zhang, Renfei Cao, Linna Guo,\* Peng Li, Chenxi Liang, Tiesheng Li\*

*College of Chemistry and Molecular Engineering, Zhengzhou University, The Key Lab of Chemical Biology and Organic Chemistry of Henan Province, The Key Lab of Nano-information Materials of Zhengzhou, Zhengzhou, 450001, P. R. China.*

\*Corresponding author.

E-mail address: Linna Guo, [guolinna@zzu.edu.cn](mailto:guolinna@zzu.edu.cn); Tiesheng Li, [lts34@zzu.edu.cn](mailto:lts34@zzu.edu.cn)

Tel.: +86-371-67766660 (Office)

Fax.: +86-371-67766660 (Office)

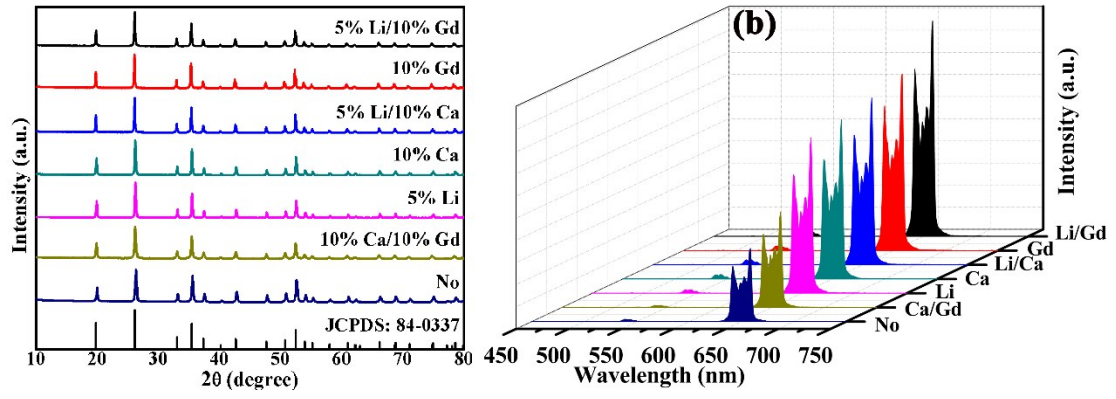

Fig. S1 (a) XRD patterns and (b) UC emission spectra of 5%  $\text{Li}^+$ , 10%  $\text{Ca}^{2+}$ , 10%  $\text{Gd}^{3+}$  single-, co- or tri-doped  $\text{LuPO}_4:20\%\text{Yb}^{3+}/1\%\text{Ho}^{3+}$  (“No” represents  $\text{LuPO}_4:20\%\text{Yb}^{3+}/1\%\text{Ho}^{3+}$ ) samples.
